# Supplementary material for: AMPA Receptor Antagonists Facilitate NEDD4-2-Mediated GRIA1 Ubiquitination by Regulating PP2B-ERK1/2-SGK1 Pathway in Chronic Epilepsy Rats
Source: MDPI journal article supplement (doi:10.3390/biomedicines9081069), 2021-08-23
Supplement: s1 [file s1]

**Supplementary information**

**AMPA receptor antagonists facilitate NEDD4-2-mediated GRIA1 ubiquitination by regulating PP2B-ERK1/2-SGK1 pathway in chronic epilepsy rats**

**Ji-Eun Kim<sup>\*</sup>, Duk-Shin Lee, Hana Park, Tae-Hyun Kim, Tae-Cheon Kang<sup>\*</sup>**

Department of Anatomy and Neurobiology and Institute of Epilepsy Research, College of Medicine, Hallym University, Chuncheon 24252, Korea

\* Correspondence: Department of Anatomy and Neurobiology and Institute of Epilepsy Research, College of Medicine, Hallym University, Chuncheon 24252, Korea. E-mail: [jieunkim@hallym.ac.kr](mailto:jieunkim@hallym.ac.kr) and [tckang@hallym.ac.kr](mailto:tckang@hallym.ac.kr); Tel.: +82-33-248-2522 and +82-33-248-2524; Fax: +82-33-248-2525.

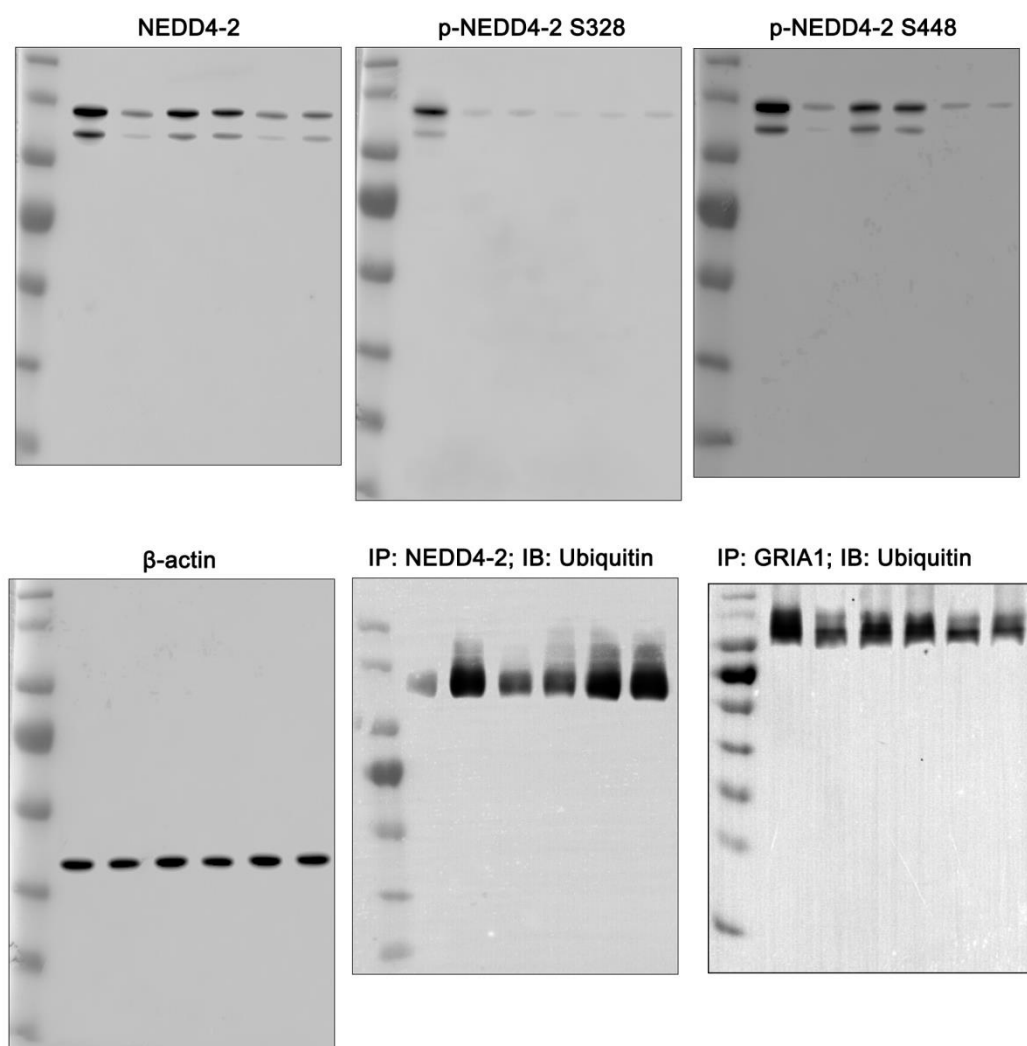

Supplementary Figure S1. Representative full-gel images of Western blots in Figure 3.

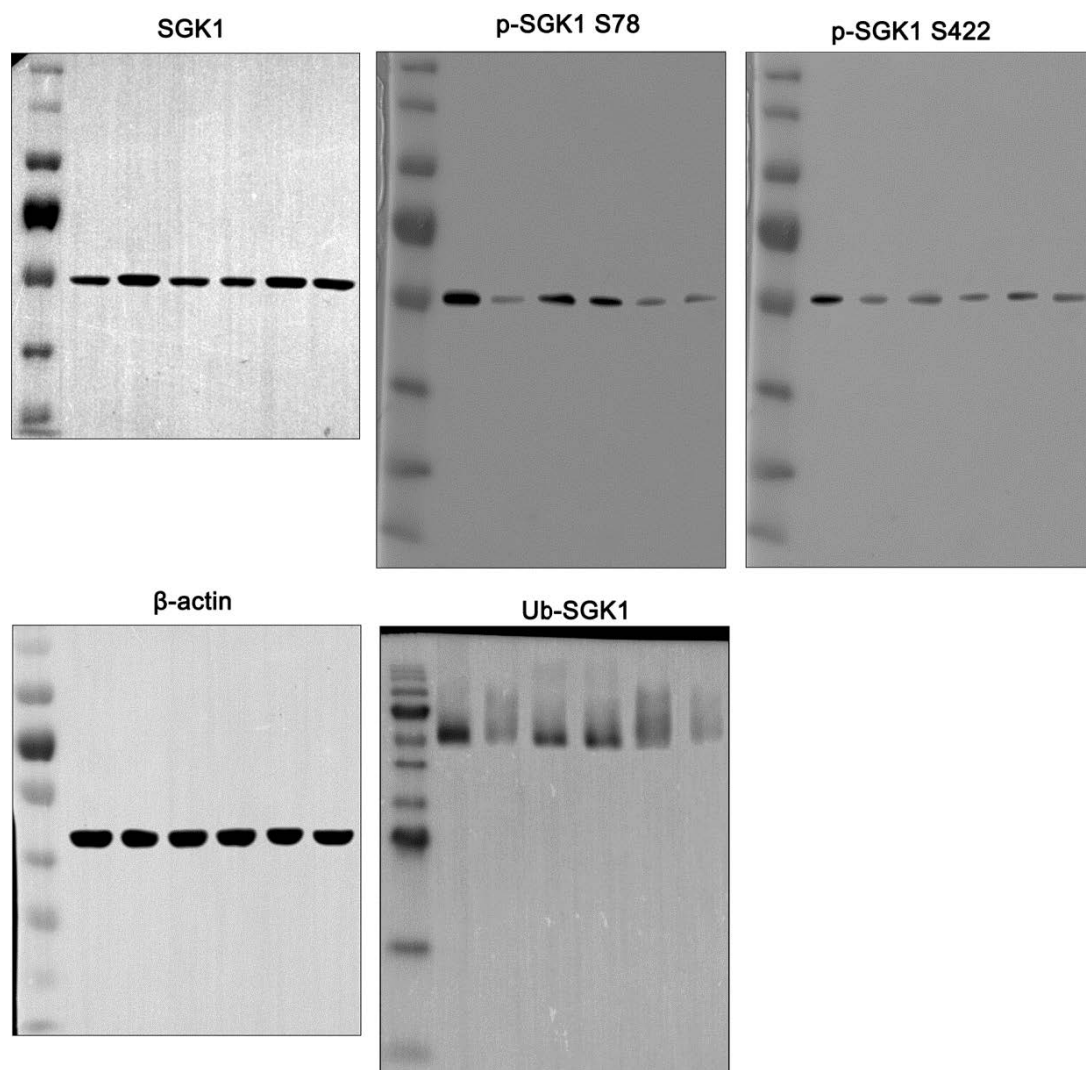

Supplementary Figure S2. Representative full-gel images of Western blots in Figure 4.

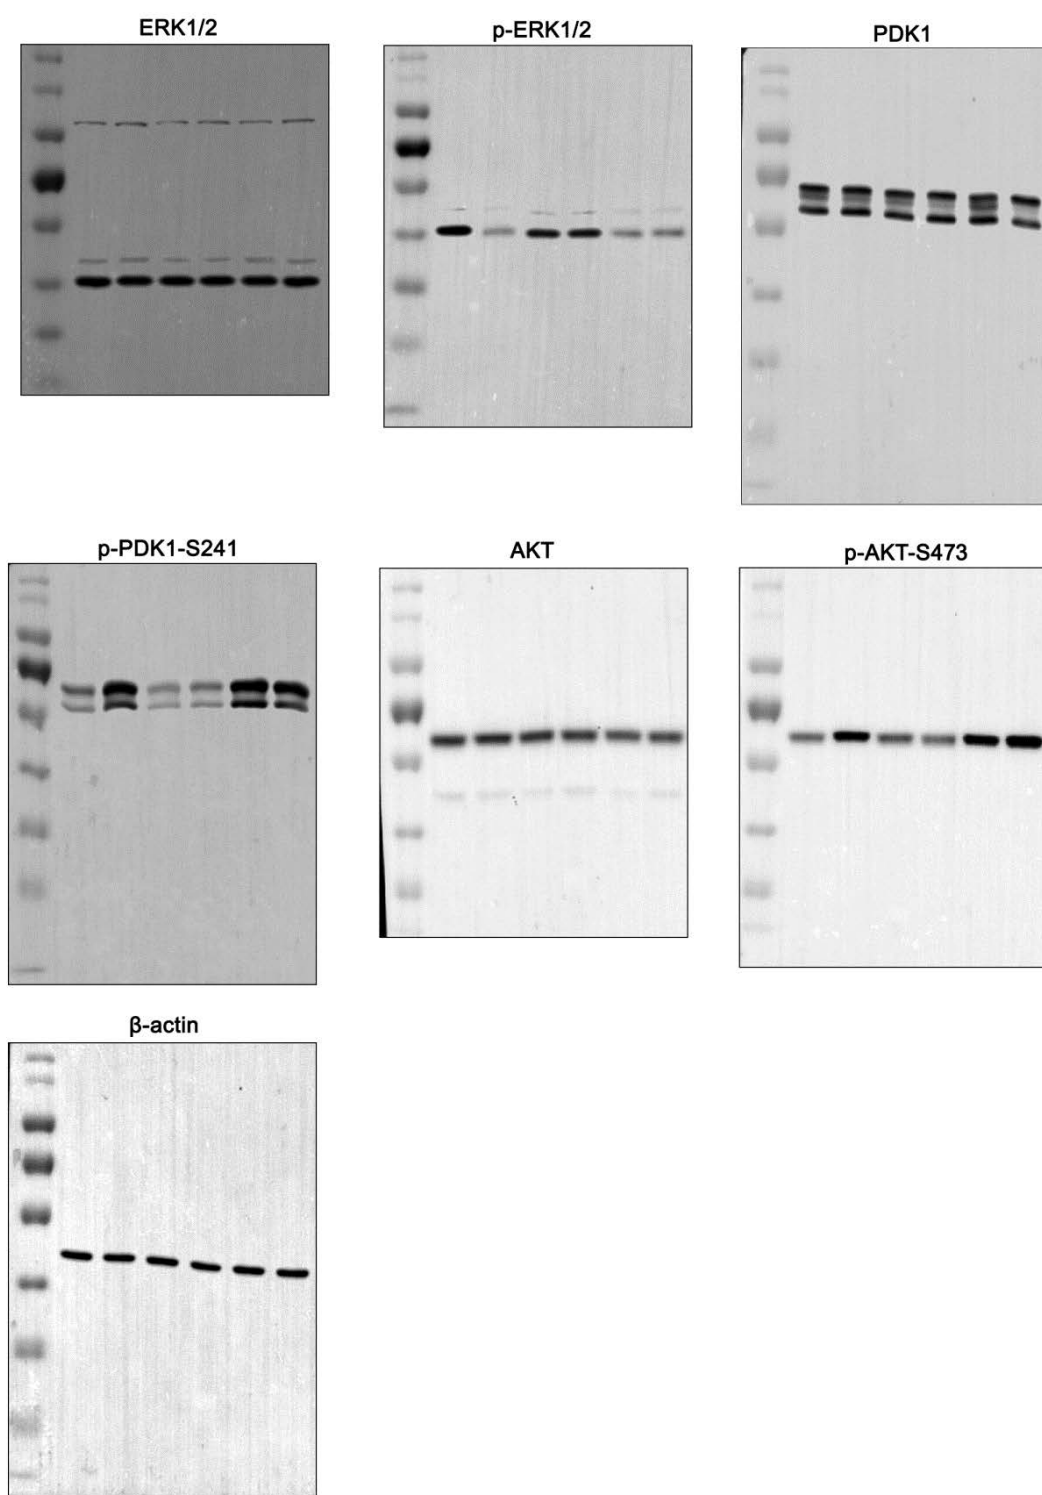

Supplementary Figure S3. Representative full-gel images of Western blots in Figure 5.

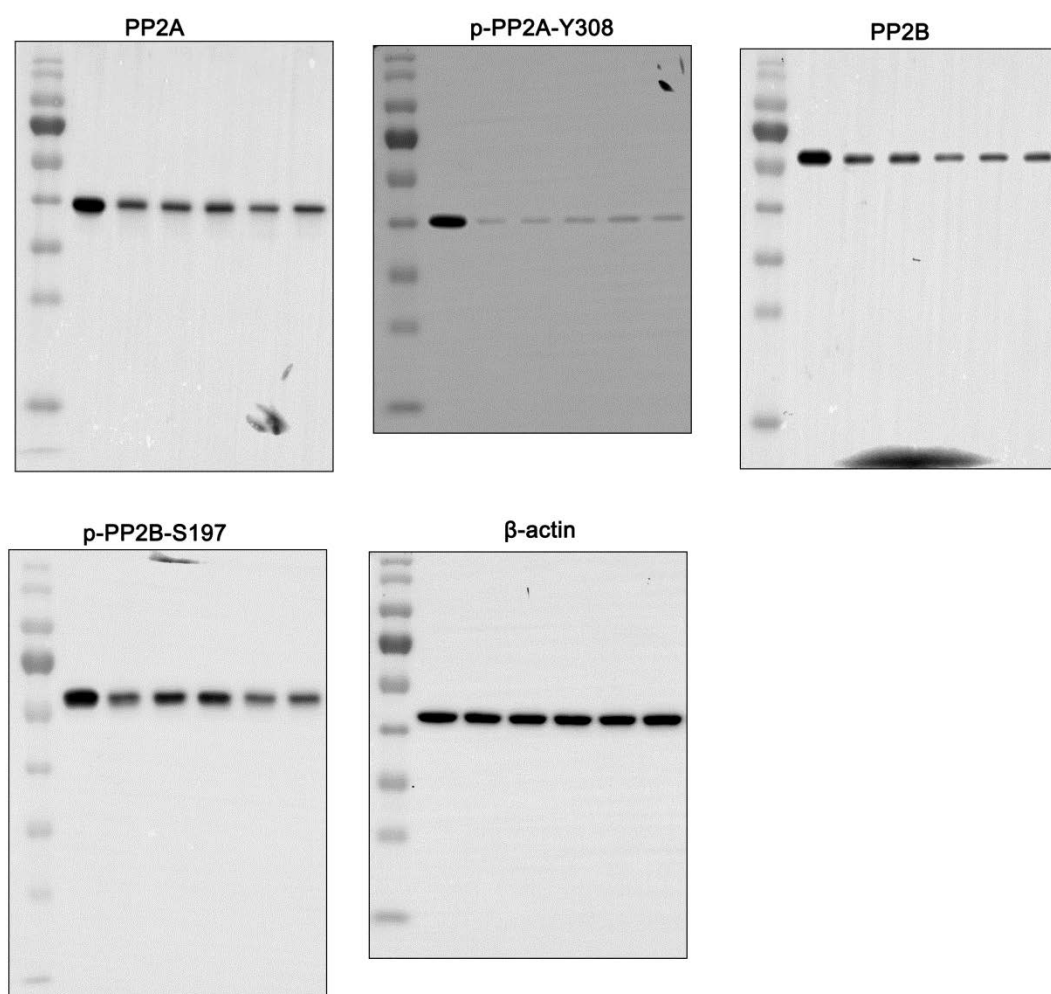

Supplementary Figure S4. Representative full-gel images of Western blots in Figure 6.

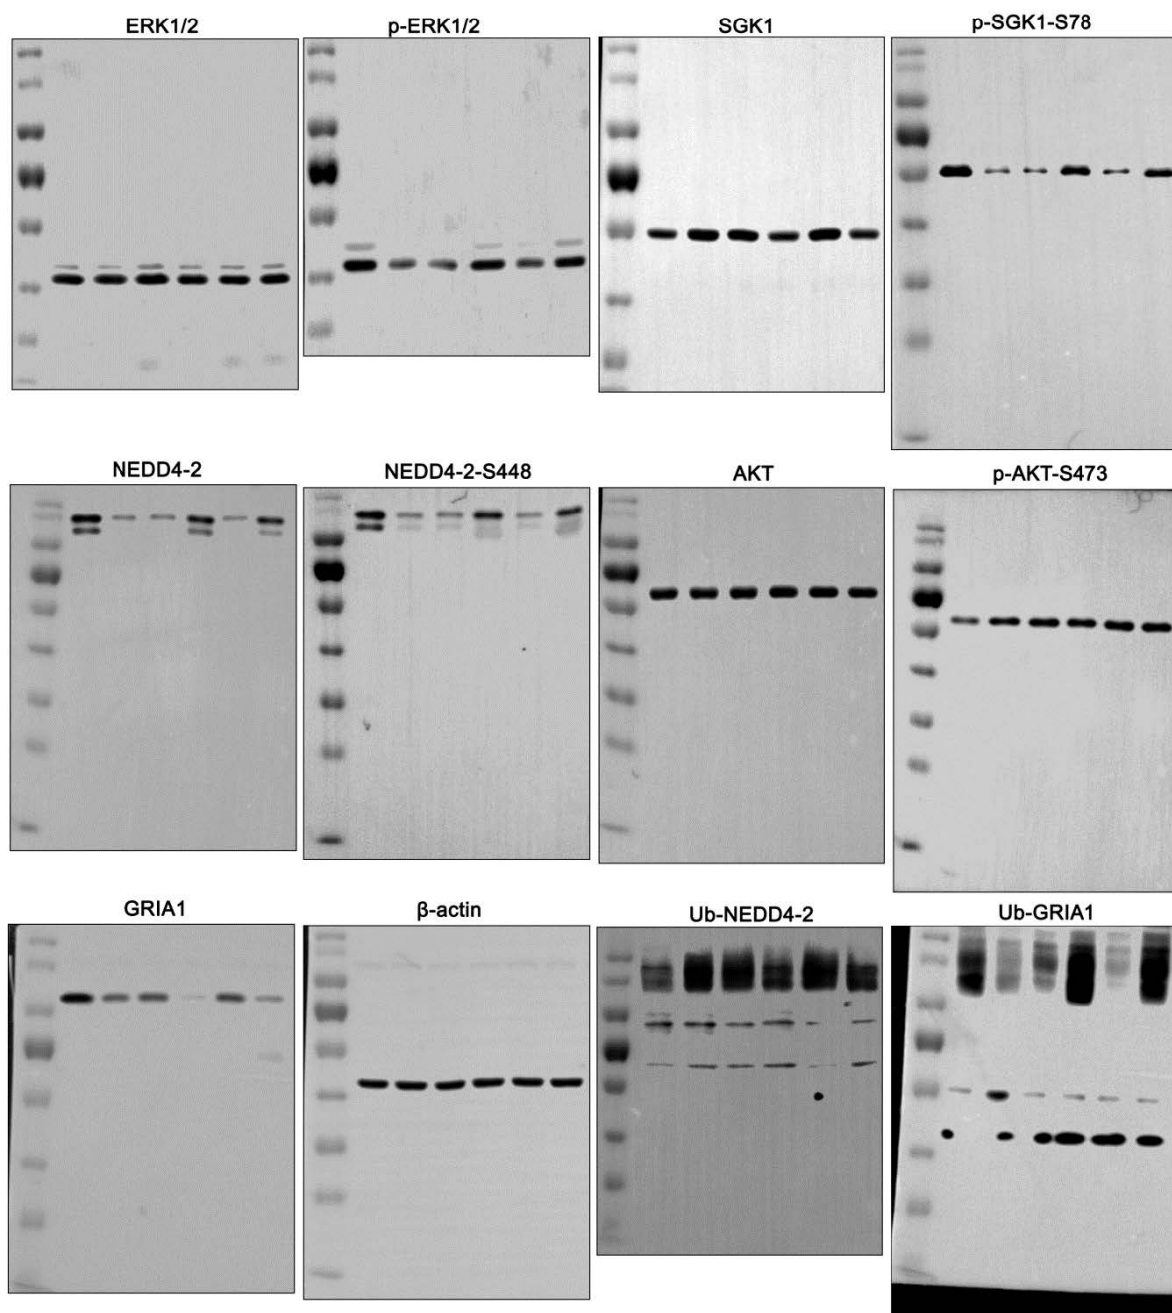

Supplementary Figure S5. Representative full-gel images of Western blots in Figure 8.
